# Supplementary material for: A comprehensive profiling of T- and B-lymphocyte receptor repertoires from a Chinese-origin rhesus macaque by high-throughput sequencing
Source: PLoS One. 2017 Aug 16;12(8):e0182733. doi: 10.1371/journal.pone.0182733 (PMC5559085; doi:10.1371/journal.pone.0182733)
Supplement: S2 Table — (XLSX) [file pone.0182733.s010.xlsx]

## Sheet: Sheet1
	TRB	TRA	IGH	IGK	IGL	IGKL
raw reads	3359232	3306326	2483686			2151941
clean reads	3054138	2890707	1707379			1527555
merged reads	2765676	2701742	1283617			1363606
reads that aligned with V gene segments	1573822	1666226	622947			729504
reads that aligned with J gene segments	2528003	2449826	762283			910502
reads that aligned with V and J gene segments	1565711	1654605	617124			720705
reads that passed error correction	1169108	1335829	330058	391171	168831
productive reads	1087192	1335829	303317	316140	159986
**below statistics based on productive reads
unique full-length reads	740855	855857	293866	283681	148415
unique CDR3 NT	218139	87938	163405	53496	40316
unique CDR3 AA	198447	60023	152444	30325	27723
